# Supplementary material for: Selection and Characterization of a DNA Aptamer Specifically Targeting Human HECT Ubiquitin Ligase WWP1
Source: MDPI journal article supplement (doi:10.3390/ijms19030763), 2018-03-07
Supplement: s1 [file s1]

## Supplementary Materials: Selection and Characterization of a DNA Aptamer Specifically Targeting Human HECT Ubiquitin Ligase WWP1

Wesley O. Tucker, Andrew B. Kinghorn, Lewis A. Fraser, Yee-Wai Cheung, and Julian A. Tanner

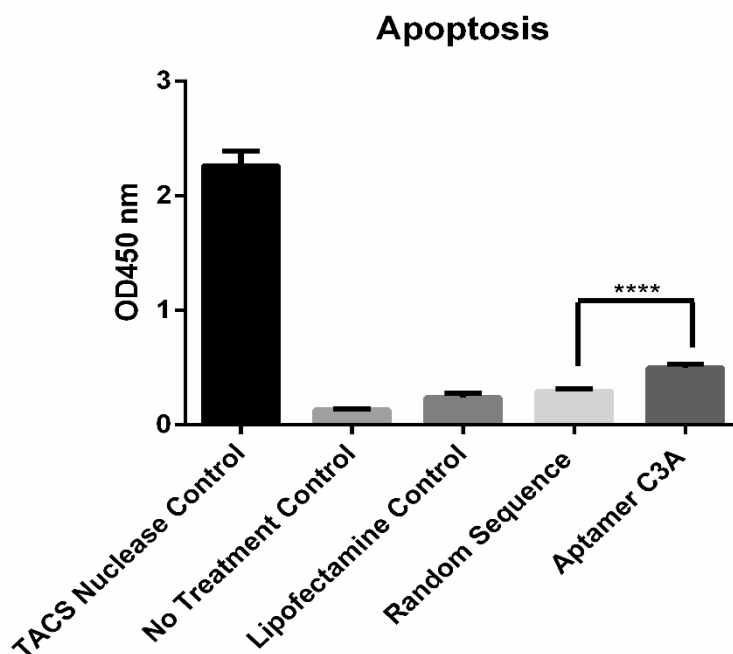

**Figure S1.** HT TiterTACS™ Assay kit (Trevigen®) apoptosis assay performed on SaOS-2 osteoblastic cells. The aptamer C3A was compared to TACS Nuclease positive control and no treatment, lipofectamine and random sequence controls.
